# Supplementary material for: Novel scandium-MOF nanocrystals as peroxidase-mimicking nanozymes for highly sensitive colorimetric detection of ascorbic acid in human serum
Source: Royal Society of Chemistry journal article supplement (doi:10.1039/d2ce01023b), 2022-08-22
Supplement: d2ce01023b1.pdf [file d2ce01023b1.pdf]

## Supporting information

### **Novel Scandium-MOF Nanocrystals as Peroxidase-mimicking Nanozymes for Highly Sensitive Colorimetric Detection of Ascorbic Acid in Human Serum**

Yiqian Su<sup>a</sup>, Hongjiao Wu<sup>a</sup>, Jiaqi Chen<sup>a</sup>, Huiqin Li<sup>a</sup>, Pengcheng Lin<sup>a,\*</sup>, Wei Xiao<sup>b</sup> and Donglin Cao<sup>b,\*</sup>

<sup>a</sup>Guangdong Provincial Key Laboratory on Functional Soft Condensed Matter, Materials and Energy School, Guangdong University of Technology

Panyu District, Guangzhou, 510006, China

E-mail: pclin@gdut.edu.cn

<sup>b</sup>Department of Laboratory Medicine, Guangdong Second Provincial General Hospital, Guangzhou, 510317, China

E-mail: xkevent@foxmail.com, caodl@126.com

|                  |                                                                                                                                                                                                                                                                                                                                         |          |
|------------------|-----------------------------------------------------------------------------------------------------------------------------------------------------------------------------------------------------------------------------------------------------------------------------------------------------------------------------------------|----------|
| <b>Figure S1</b> | <b>Zeta potential of the Sc-MOF nanozyme dispersion.</b>                                                                                                                                                                                                                                                                                | <b>3</b> |
| <b>Figure S2</b> | <b>EDX-analysis of the element composition of the Sc-MOF nanozyme.</b>                                                                                                                                                                                                                                                                  | <b>4</b> |
| <b>Table S1</b>  | <b>The element composition of Sc-MOF nanozyme.</b>                                                                                                                                                                                                                                                                                      | <b>5</b> |
| <b>Figure S3</b> | <b>Full-survey-scan spectrum of the Sc-MOF nanozyme sample.</b>                                                                                                                                                                                                                                                                         | <b>6</b> |
| <b>Figure S4</b> | <b>The gradually deepened color of dispersion containing TMB and H<sub>2</sub>O<sub>2</sub> along with the increased concentration of Sc-MOF nanozyme from 0 to 50 mg L<sup>-1</sup>, a-g: 0, 0.5 mg L<sup>-1</sup>, 2 mg L<sup>-1</sup>, 5 mg L<sup>-1</sup>, 10 mg L<sup>-1</sup>, 25 mg L<sup>-1</sup> and 50 mg L<sup>-1</sup>.</b> | <b>7</b> |
| <b>Fig S5</b>    | <b>Zeta potential of the binary Sc-MOF nanozyme-TMB dispersion.</b>                                                                                                                                                                                                                                                                     | <b>8</b> |

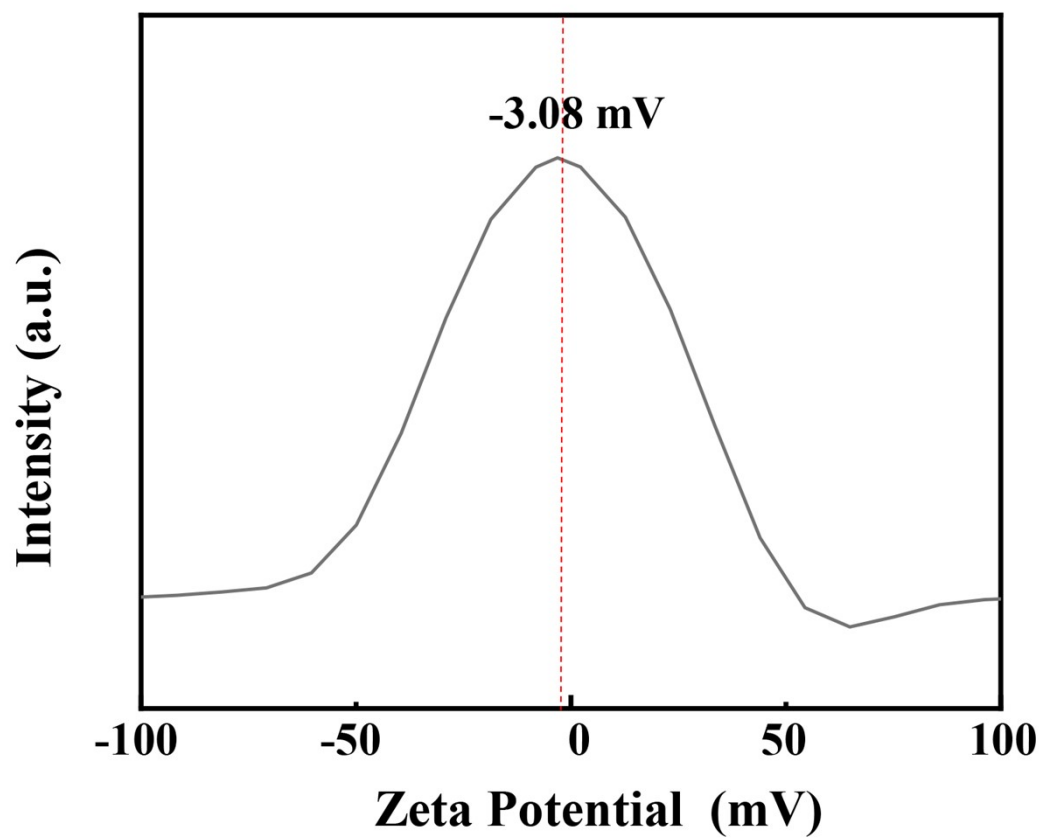

Figure S1. Zeta potential of the Sc-MOF nanozyme dispersion.

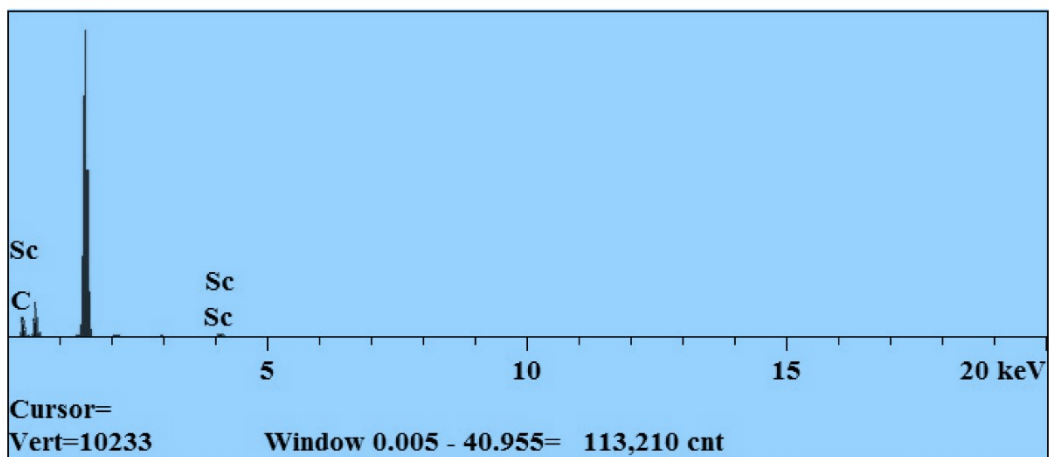

Figure. S2. EDX-analysis of the element composition of the Sc-MOF nanozyme.

Table S1. The element composition of Sc-MOF nanozyme.

| <b>Elements</b> | <b>At%</b> |
|-----------------|------------|
| C               | 29.04      |
| O               | 59.46      |
| Sc              | 11.50      |
| Total           | 100.00     |

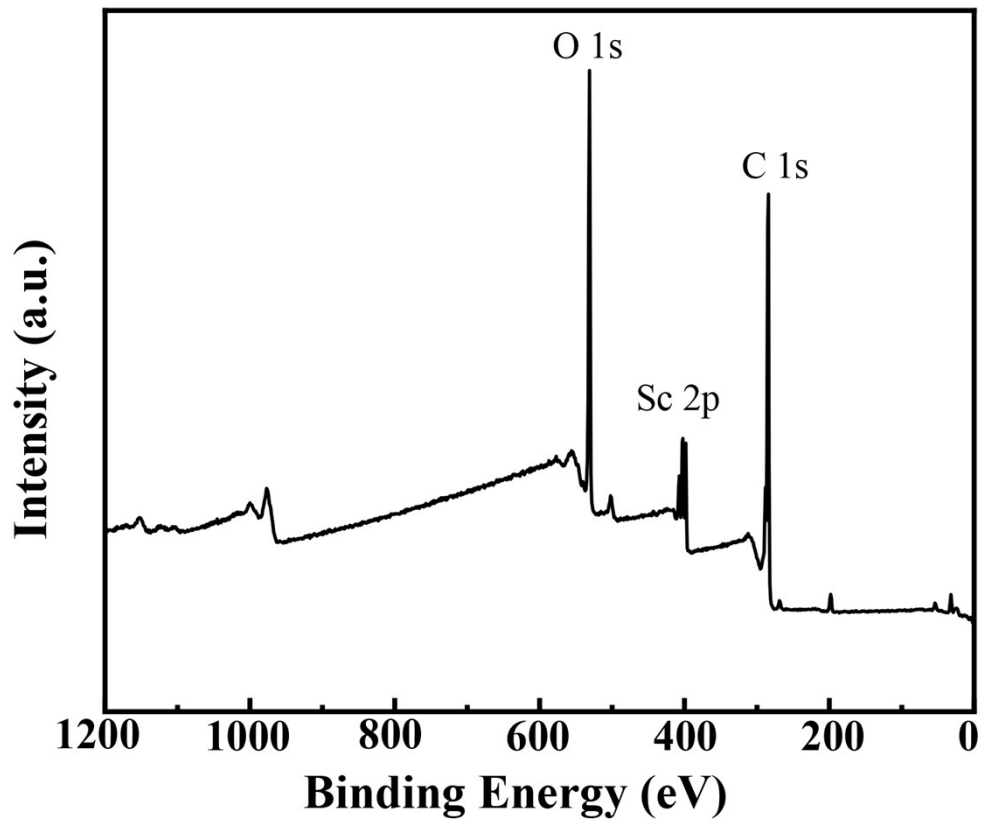

Figure. S3. Full-survey-scan spectrum of the Sc-MOF nanozyme.

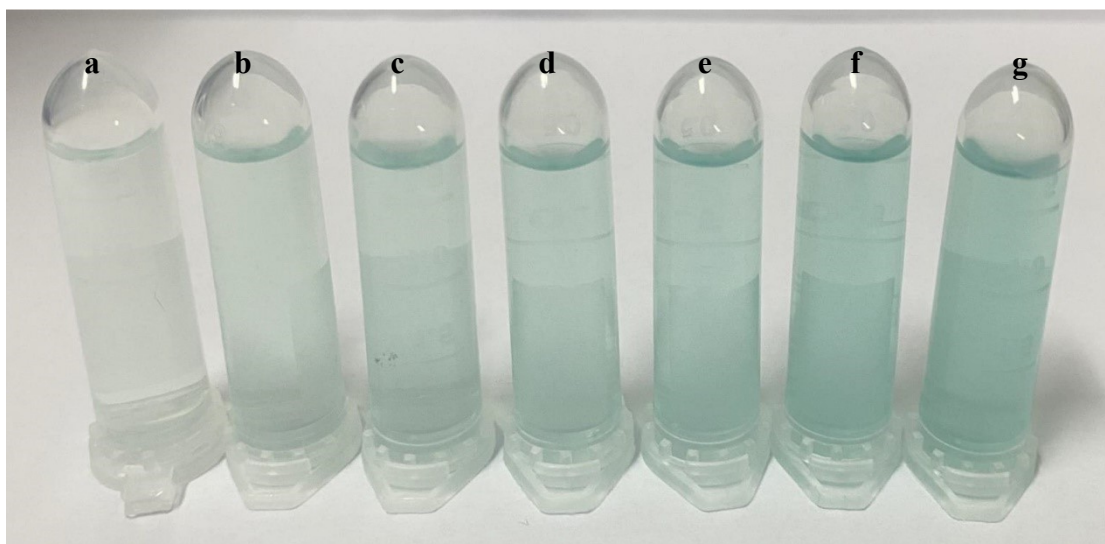

Figure. S4. The gradually deepened color of dispersion containing TMB and  $\text{H}_2\text{O}_2$  along with the increased concentration of Sc-MOF nanozyme from 0 to  $50 \text{ mg L}^{-1}$ , a-g: 0,  $0.5 \text{ mg L}^{-1}$ ,  $2 \text{ mg L}^{-1}$ ,  $5 \text{ mg L}^{-1}$ ,  $10 \text{ mg L}^{-1}$ ,  $25 \text{ mg L}^{-1}$  and  $50 \text{ mg L}^{-1}$ .

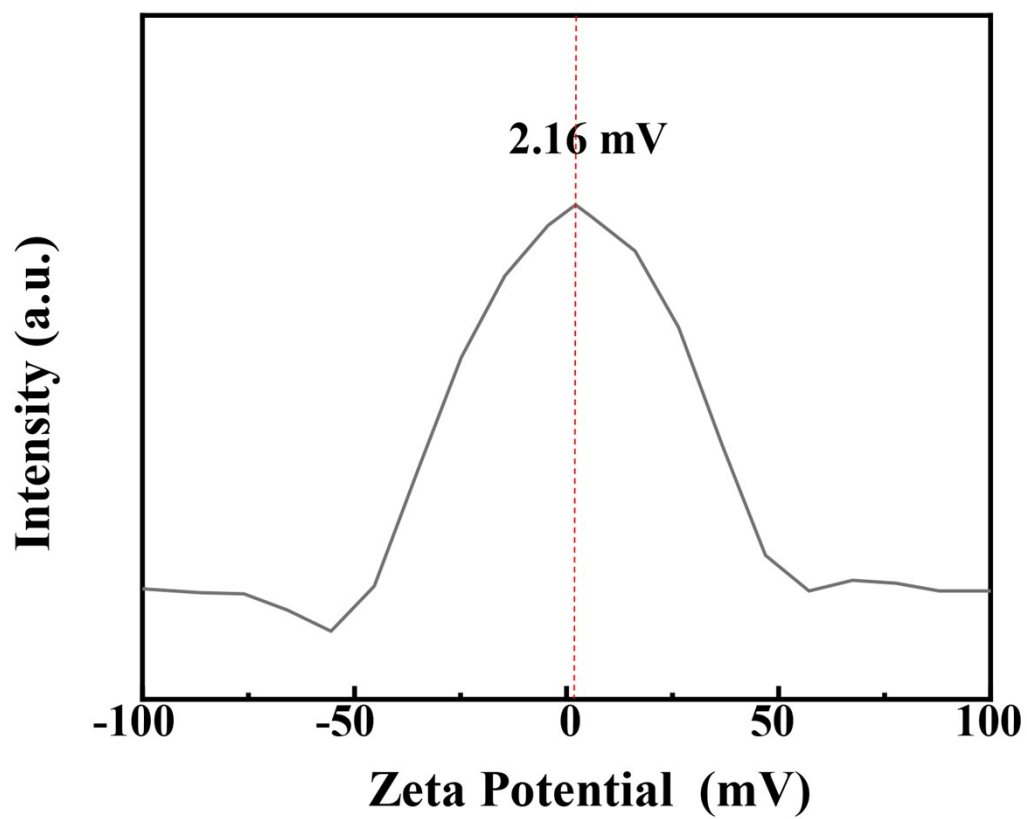

Figure. S5. Zeta potential of the binary Sc-MOF-TMB dispersion.
